# Supplementary material for: Amelioration of Sensorineural Hearing Loss through Regulation of Trpv1, Cacna1h, and Ngf Gene Expression by a Combination of Cuscutae Semen and Rehmanniae Radix Preparata
Source: MDPI journal article supplement (doi:10.3390/nu15071773), 2023-04-05
Supplement: s1 [file s1]

## Supplementary Material

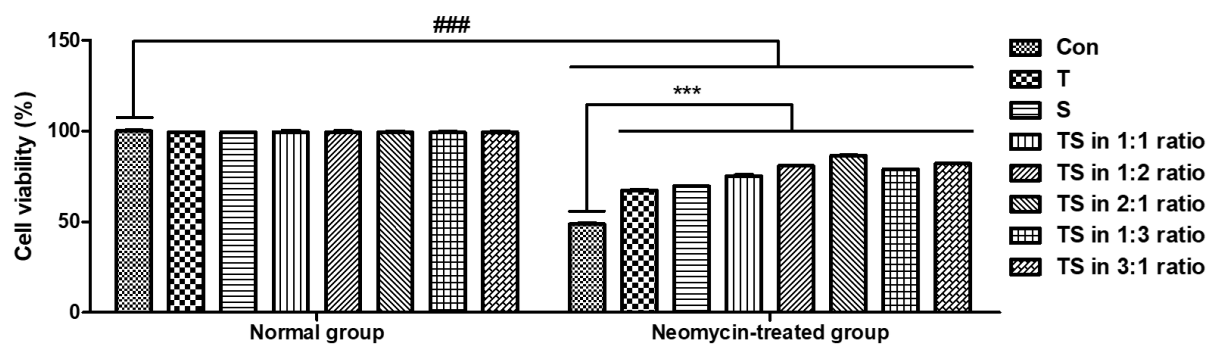

Figure S1. Ratio assessment of Cuscutae Semen (T) and Rehmanniae Radix Preparata (S) combination using MTT assay in HEI-OC1 cells. Data are presented as means  $\pm$  SEM of three independent experiments in triplicates. ### $p < 0.001$ , \*\*\* $p < 0.001$ .
